# Supplementary material
Source: PubMed Central journal article supplement (PMC2040903)

A

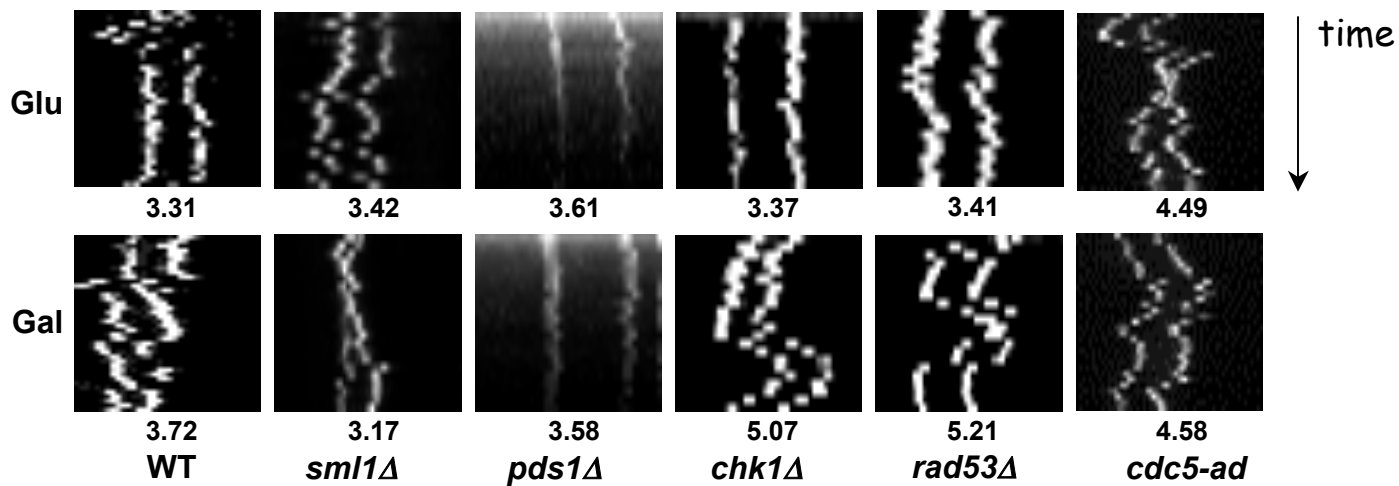

B

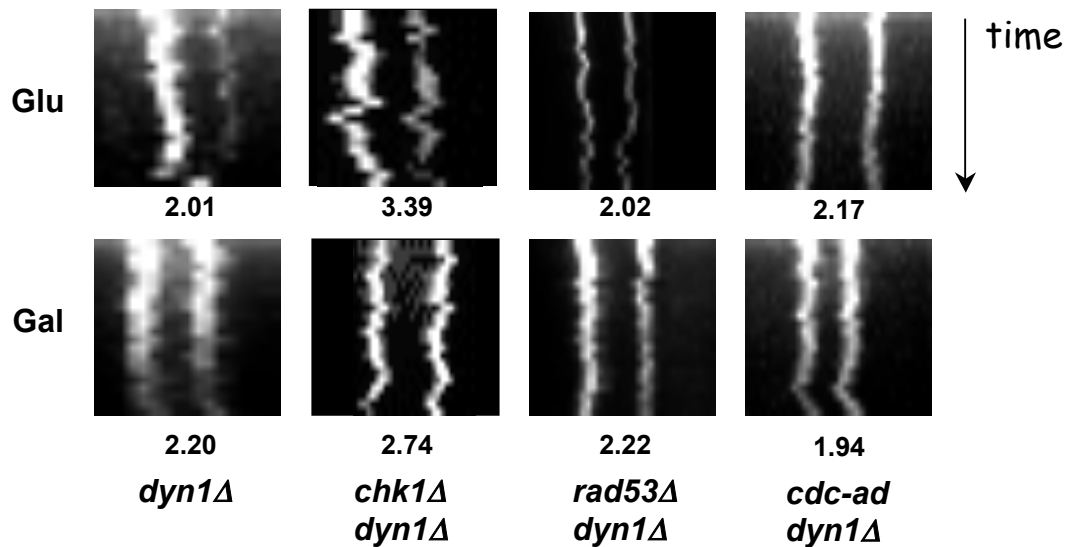

Supplement: pnas_0609636104_1.pdf [file pnas_0609636104_1.pdf]

Percent adapted

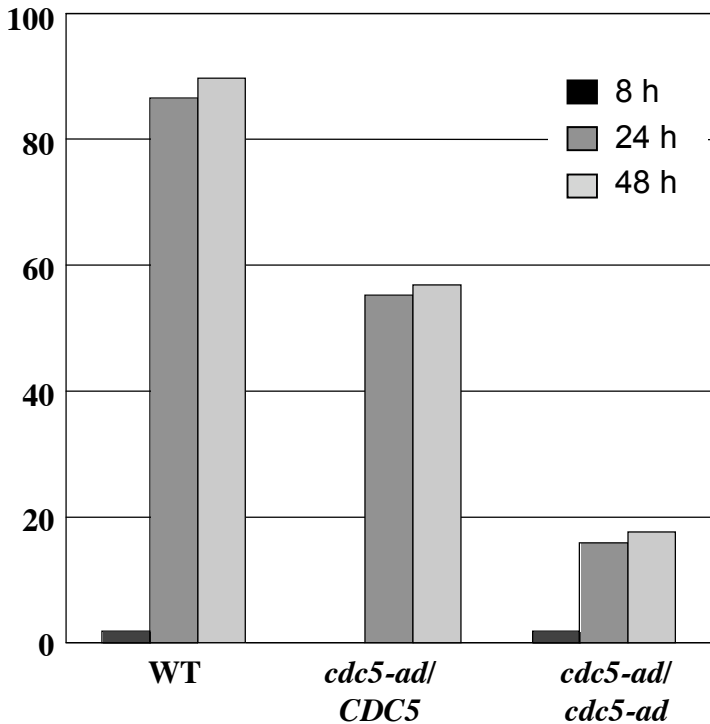

Supplement: pnas_0609636104_2.pdf [file pnas_0609636104_2.pdf]
